# Supplementary material for: An image dataset related to automated macrophage detection in immunostained lymphoma tissue samples
Source: PubMed Central journal article supplement (PMC7066390; doi:10.1093/gigascience/giaa016), 2020-03-12
Supplement: giaa016_response_to_reviewer_comments_revision_1.pdf [file giaa016_response_to_reviewer_comments_revision_1.pdf]

## Author's Response To Reviewer Comments

Close

The required changes and insertions have been made. Thank you for your assistance with RRIDs. ORCIDs of all authors are included in a separate file as part of the submission.

Close
